# Supplementary material for: Subthreshold activation of the melanocortin system causes generalized sensitization to anorectic agents in mice
Source: JCI journal article supplement (doi:10.1172/jci178250), 2024-07-14
Supplement: sd1 [file 1]

## Supplemental data

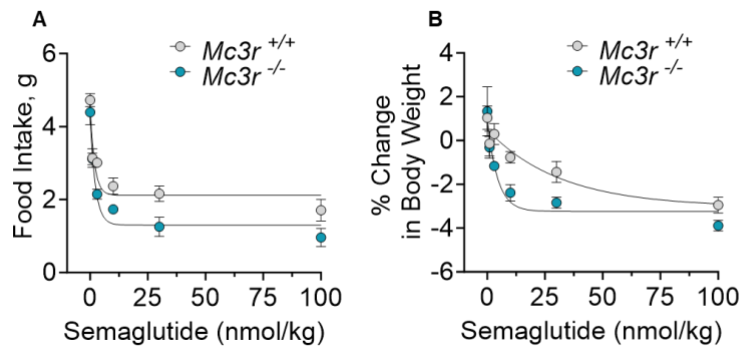

**Figure 1S: Deleting MC3R increases semaglutide responsiveness.** (A-B) 24-hour feeding and percent changes in body weight in response to semaglutide (1-100nmol/kg, sc, n=8/group) in *Mc3r*<sup>+/+</sup> and *Mc3r*<sup>-/-</sup> male mice. Repeated measures of two-way ANOVA were corrected for multiple comparisons using the Tukey–Kramer method for each time point, and data were fitted with four parameters: nonlinear fit.

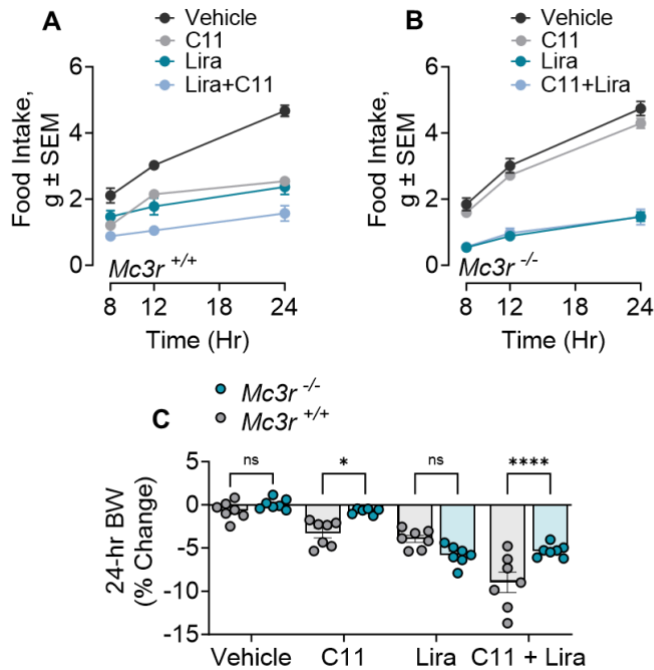

**Figure 2S: Pharmacological inhibition of MC3R increases liraglutide responsiveness.** (A-C) Time course feeding and 24-hr percent change in body weight after administration of compound 11 (1nmol/1µl, icv) or vehicle (PBS, ip, DMSO/1µl, icv). Time course (8-24 hours) feeding and 24-hour change in body weight liraglutide injection (0.2mg/kg, sc), compound 11 (C11; 1nmol/1µl, icv), a co-administration of C11 and liraglutide, and vehicle (PBS, sc; DMSO/1µl, icv) of in *Mc3r*<sup>+/+</sup> and *Mc3r*<sup>-/-</sup> male mice. Statistical analysis was done with 2-way ANOVA with Tukey post hoc analysis. \*p < 0.05, \*\*p < 0.01, \*\*\*\*p < 0.001.

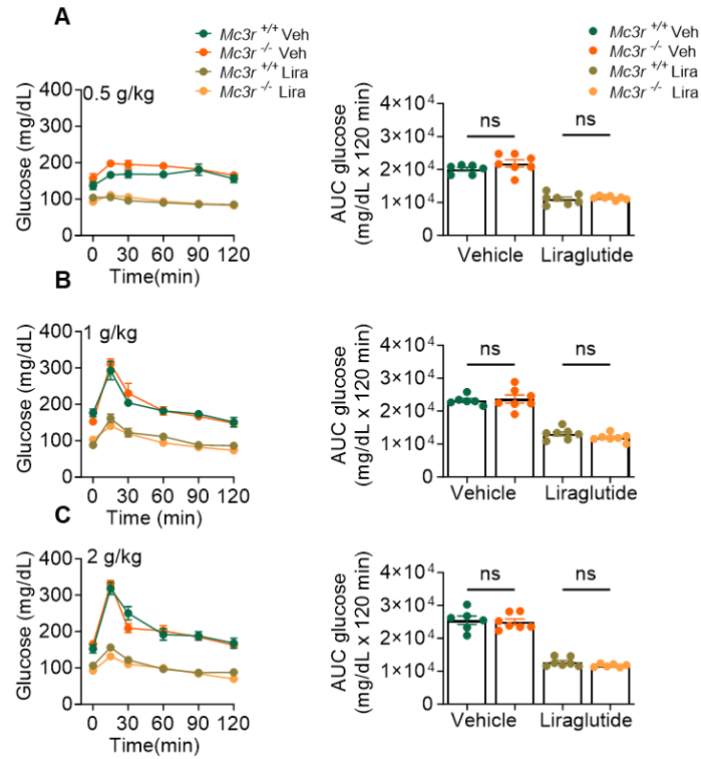

**Figure 3S. MC3R deletion has no effect on glucose disposal associated with liraglutide.** Glucose levels and area under the curve before and after oral administration of glucose at 0.5 g/kg (A), 1.0 g/kg (B), 2.0 g/kg (C) after liraglutide (0.2 mg/kg), and vehicle treatment in *Mc3r*<sup>+/+</sup> and *Mc3r*<sup>-/-</sup> male mice (n = 7/group).
